# Supplementary material for: The Fidelity of Dynamic Signaling by Noisy Biomolecular Networks
Source: PLOS journal article supplement (doi:10.1371/journal.pcbi.1002965), 2013-03-28
Supplement: S1 (10.1371/journal.pcbi.1002965.s001) [file journal.pcbi.1002965.s001]

301 Moved Permanently

# Moved Permanently

The document has moved here.

---

Apache Server at www.ploscompbiol.org Port 80
